# Supplementary material for: A simple cyanide test kit for water and fruit juices
Source: Royal Society of Chemistry journal article supplement (doi:10.1039/c0ay00458h), 2010-01-01
Supplement: c0ay00458h.pdf [file c0ay00458h.pdf]

Supporting Information

**Table S1** Effect of temperature on the color scale and the RGB values obtained on the paper strip from colorimetric determination of cyanide after converting the free cyanide into the vapor form.

| Temperature (°C) | 10 cyanide $\mu\text{g l}^{-1}$                                                                   | 50 cyanide $\mu\text{g l}^{-1}$                                                                   |
|------------------|---------------------------------------------------------------------------------------------------|---------------------------------------------------------------------------------------------------|
| 10               |  (245, 230, 255) |  (180, 160, 190) |
| 27               |  (245, 230, 255) |  (180, 160, 190) |
| 39               |  (230, 210, 245) |  (170, 150, 185) |

The values in the parentheses are the RGB values.
